# Supplementary material for: Impact of Genotype, Serum Bile Acids, and Surgical Biliary Diversion on Native Liver Survival in FIC1 Deficiency
Source: PubMed Central journal article supplement — Hepatology. 2021 Jul 13;74(2):892–906. doi: 10.1002/hep.31787 (PMC8456904; doi:10.1002/hep.31787), 2021-07-13
Supplement: HEP-74-892-s001.pdf [file HEP-74-892-s001.pdf]

**Supplementary material**

**Supporting TABLE S1. Genetic Profile and Corresponding Genotype Severity Allocation of the 130 Included Patients**

|               | <b>First Allele</b>                              | <b>Second Allele</b>           | <b>n</b> |
|---------------|--------------------------------------------------|--------------------------------|----------|
| <b>FIC1-A</b> | c.923G>T; p.Gly308Val                            | c.923G>T; p.Gly308Val          | 18       |
|               | c.1660G>A; p.Asp554Asn                           | c.1660G>A; p.Asp554Asn         | 8        |
|               | c.1367C>T; p.Thr456Met                           | c.1367C>T; p.Thr456Met         | 4        |
|               | c.1799G>A; p.Arg600Gln                           | c.1799G>A; p.Arg600Gln         | 3        |
|               | c.625A>C; p.Pro209Thr                            | c.625A>C; p.Pro209Thr          | 2        |
|               | c.625A>C; p.Pro209Thr                            | c.2081T>A; p.Ile694Asn         | 2        |
|               | c.1587_1589delCTT; p.Phe529del                   | c.1587_1589delCTT; p.Phe529del | 2        |
|               | c.2081T>A; p.Ile694Asn                           | c.2081T>A; p.Ile694Asn         | 2        |
|               | c.886C>T ; p.Arg296Cys                           | c.2081T>A; p.Ile694Asn         | 2        |
|               | c.1208C>T; p.Ser403Phe                           | c.1208C>T; p.Ser403Phe         | 1        |
|               | c.1264G>C; p.Asp422His                           | c.2734G>A; p.Gly912Arg         | 1        |
|               | c.1697G>A; p.Gly566Asp                           | c.1697G>A; p.Gly566Asp         | 1        |
|               | c.1798C>T; p.Arg600Trp                           | c.1367C>G; p.Thr456Arg         | 1        |
|               | c.1798C>T; p.Arg600Trp                           | c.2966A>T; p.Asn989Ile         | 1        |
|               | c.1798C>T; p.Arg600Trp                           | c.1798C>T; p.Arg600Trp         | 1        |
|               | c.1982T>C; p.Ile661Thr                           | c.2103G>C; p.Gly702Arg         | 1        |
|               | c.1982T>C; p.Ile661Thr<br>+c.923G>T; p.Gly308Val | c.1220G>A; p.Ser407Asn         | 1        |
|               | c.2081T>A; p.Ile694Asn                           | c.2663C>A; p.Thr888Lys         | 1        |
|               | c.2081T>A; p.Ile694Asn                           | c.2236T>C; p.Cys746Arg         | 1        |
|               | c.2199A>C; p.Asp734Ala                           | c.2199A>C; p.Asp734Ala         | 1        |
|               | c.2450C>A; p.Thr717Asn                           | c.2450C>A; p.Thr717Asn         | 1        |
|               | c.2558T>C; p.Phe853Ser                           | c.2558T>C; p.Phe853Ser         | 1        |
|               | c.2663C>T; p.Thr888Met                           | c.2081T>A; p.Ile694Asn         | 1        |

|               |                                                   |                                        |   |
|---------------|---------------------------------------------------|----------------------------------------|---|
|               | c.2674G>A; p.Gly892Arg                            | c.1982T>C; p.Ile661Thr                 | 1 |
|               | c.2989G>A; p.Val997Met                            | c.2699T>C; p.Met900Thr                 | 1 |
|               | c.2989G>A; p.Val997Met<br>+c.2699T>C; p.Met900Thr | c.913T>A; p.Phe305Ile                  | 1 |
|               | c.319T>C; p.Cys107Arg)                            | c.319T>C; p.Cys107Arg                  | 1 |
|               | c.625C>A; p.Pro209Thr                             | c.632A>C; p.Asp211Ala                  | 1 |
|               | c.644T>G; p.Leu215Arg                             | c.644T>G; p.Leu215Arg                  | 1 |
|               | c.697G>A; p.Gly233Arg                             | c.697G>A; p.Gly233Arg                  | 1 |
|               | c.863T>C; p.Leu288Ser                             | c.863T>C; p.Leu288Ser                  | 1 |
|               | c.886C>T; p.Arg296Cys                             | c.886C>T; p.Arg296Cys                  | 1 |
|               | c.940G>C; p.Gly314Arg                             | c.1798C>T; p.Arg600Trp                 | 1 |
| <b>FIC1-B</b> | c.1367C>T; p.Thr456Met                            | <b>c.1804C&gt;T; p.Arg602Ter</b>       | 2 |
|               | c.625A>C; p.Pro209Thr                             | <b>c.2854C&gt;T; p.Arg952Ter</b>       | 1 |
|               | <b>c.2374_2375insT;<br/>p.Pro792fsTer808</b>      | c.2989G>A; p.Val997Met                 | 1 |
|               | c.1367C>T; p.Thr456Met                            | <b>c.1804C&gt;T; p.TerArg602Ter</b>    | 1 |
|               | <b>c.1194del; p.Met399TrpfsTer12</b>              | c.2237G>A; p.Cys746Tyr                 | 1 |
|               | <b>c.1232dupT; p.Arg412SerfsTer18</b>             | c.1798C>T; p.Arg600Trp                 | 1 |
|               | c.1336G>A; p.Gly446Arg                            | <b>c.2271T&gt;A; p.Tyr757Ter</b>       | 1 |
|               | c.1336G>A; p.Gly446Arg                            | <b>c.782-1G&gt;A; p.(?)</b>            | 1 |
|               | c.1336G>A; p.Gly446Arg                            | <b>c.1587_1589delCTT; p.Phe527Ter</b>  | 1 |
|               | c.1367C>A; p.Thr456Lys                            | <b>c.3292delG; p.Val1098Ter</b>        | 1 |
|               | c.1660G>A; p.Asp554Asn                            | <b>c.3602delG; p.Gly1201AlafsTer88</b> | 1 |
|               | c.1660G>A; p.Asp554Asn                            | <b>c.2097+2T&gt;C; p.(?)</b>           | 1 |
|               | <b>c.1753G&gt;T; p.Glu585Ter</b>                  | c.2246T>C; p.Leu749Pro                 | 1 |
|               | c.1982T>C; p.Ile661Thr                            | <b>c.1804C&gt;T; p.Arg602Ter</b>       | 1 |
|               | c.1982T>C; p.Ile661Thr                            | <b>c.2097+2T&gt;C; p.(?)</b>           | 1 |

|               |                                                                 |                                                                 |   |
|---------------|-----------------------------------------------------------------|-----------------------------------------------------------------|---|
|               | c.1982T>C; p.Ile661Thr                                          | <b>c.279G&gt;A; p.(?)</b>                                       | 1 |
|               | c.2081T>A; p.Ile694Asn                                          | <b>c.279G&gt;A; p.(?)</b>                                       | 1 |
|               | c.2081T>A; p.Ile694Asn                                          | <b>c.2788C&gt;T; p.Arg930Ter</b>                                | 1 |
|               | <b>c.2097+2T&gt;C; p.(Ile645-Ile699del)</b>                     | c.2982C>A; p.Ser994Arg                                          | 1 |
|               | c.2150C>A; p.Thr717Asn                                          | <b>c.2854C&gt;T; p.Arg952Ter</b>                                | 1 |
|               | c.2741A>T; p.Glu914Val                                          | <b>c.3399+2G&gt;A; p.(?)</b>                                    | 1 |
|               | <b>c.279G&gt;A; p.(?)</b>                                       | c.1660G>A; p.Asp555Asn                                          | 1 |
|               | <b>c.2821C&gt;T; p.TerArg941Ter</b>                             | c.2081T>A; p.Ile694Asn                                          | 1 |
|               | <b>c.2854C&gt;T; p.TerArg952Ter</b>                             | c.1982T>C; p.Ile661Thr                                          | 1 |
|               | <b>c.2877dup; p.Ala960CysfsTer50</b>                            | c.2558T>C; p.Phe853Ser                                          | 1 |
|               | c.571T>A; p.Trp191Arg                                           | <b>c.884T&gt;G; p.Leu295Ter</b>                                 | 1 |
|               | c.749T>A; p.Leu250His                                           | <b>c.811C&gt;T; p.TerArg271Ter</b>                              | 1 |
|               | c.886C>T; p.Arg296Cys                                           | <b>c.1675_1689delGTAAACGCTGCCAGG;<br/>p.Val559_Arg563del</b>    | 1 |
| <b>FIC1-C</b> | <b>c.2932-3C&gt;A; p.(?)</b>                                    | <b>c.2932-3C&gt;A; p.(?)</b>                                    | 6 |
|               | <b>c.2097+2T&gt;C; p.(Ile645-Ile699del)</b>                     | <b>c.2097+2T&gt;C; p.(Ile645-Ile699del)</b>                     | 3 |
|               | <b>c.1030-1G&gt;A; p.(?)</b>                                    | <b>c.2014_2015delAA;<br/>p.Lys672ValfsTer17</b>                 | 2 |
|               | <b>c.2742_2743delAGinsT;<br/>p.Gly914AspfsTer32</b>             | <b>c.2742_2743delAGinsT;<br/>p.Gly914AspfsTer32</b>             | 2 |
|               | <b>c.763C&gt;T; p.Arg255Ter</b>                                 | <b>c.1587_1589del; p.Phe529del</b>                              | 2 |
|               | <b>c.1429+1G&gt;A; p.(?)</b>                                    | <b>c.1429+1G&gt;A; p.(?)</b>                                    | 1 |
|               | <b>c.1602C&gt;A; p.Cys534Ter</b>                                | <b>c.2844delC; p.Cys948Ter</b>                                  | 1 |
|               | <b>c.1631-?_1932+?del; p.(?)</b>                                | <b>c.1631-?_1932+?del; p.(?)</b>                                | 1 |
|               | <b>c.1993G&gt;T; p.Glu665Ter</b>                                | <b>c.3617_3623dupGCTCGGC;<br/>p.Tyr1209LeufsTer29</b>           | 1 |
|               | c.208G>A; p.Asp70Asn (VOUS)<br><b>+c.811C&gt;T; p.Arg271Ter</b> | c.208G>A; p.Asp70Asn (VOUS)<br><b>+c.811C&gt;T; p.Arg271Ter</b> | 1 |

|  |                                                     |                                                     |   |
|--|-----------------------------------------------------|-----------------------------------------------------|---|
|  | <b>c.2418+5G&gt;A; p.(?)</b>                        | <b>c.2418+5G&gt;A; p.(?)</b>                        | 1 |
|  | <b>c.2737C&gt;T; p.Gln913Ter</b>                    | <b>c.2737C&gt;T; p.Gln913Ter</b>                    | 1 |
|  | <b>c.2821C&gt;T; p.Arg941Ter</b>                    | <b>c.2821C&gt;T; p.Arg941Ter</b>                    | 1 |
|  | <b>c.3040C&gt;T; p.Arg1014Ter</b>                   | <b>c.2097+2T&gt;C; p.(?)</b>                        | 1 |
|  | <b>c.3127delA; p.Thr1043HisfsTer3</b>               | <b>c.3127delA; p.Thr1043HisfsTer3</b>               | 1 |
|  | <b>c.3410C&gt;G; p.Ser1137Ter</b>                   | <b>c.3410C&gt;G; p.Ser1137Ter</b>                   | 1 |
|  | <b>c.3531+1G&gt;A; p.(?)</b>                        | <b>c.3531+1G&gt;A; p.(?)</b>                        | 1 |
|  | <b>c.3554T&gt;A; p.Leu1185Ter</b>                   | <b>c.2707+4A&gt;G; p.(?)</b>                        | 1 |
|  | <b>c.3622_3628delGCCTACG; p.(?)</b>                 | <b>c.3622_3628delGCCTACG; p.(?)</b>                 | 1 |
|  | <b>c.589_592delinsCTCCA;<br/>p.Gly197LeufsTer10</b> | <b>c.589_592delinsCTCCA;<br/>p.Gly197LeufsTer10</b> | 1 |
|  | <b>c.607insA; p.Asn205LysfsTer2</b>                 | <b>c.2532delT; p.Lys845ArgfsTer36</b>               | 1 |
|  | <b>c781+1G&gt;A; p.(?)</b>                          | <b>c.2097+2T&gt;C; p.(?)</b>                        | 1 |
|  | <b>c.958-967del; p.Met320ValfsTer13</b>             | <b>c.958-967del; p.Met320ValfsTer13</b>             | 1 |
|  | <b>g.24774-42062del</b>                             | <b>g.24774-42062del</b>                             | 1 |

Genetic profile includes mutations in *ATP8B1* on first and second allele.

Bold indicates PPTM.

Abbreviations: *ATP8B1*, adenosine triphosphate (ATP)ase phospholipid transporting 8B1; FIC1, familial intrahepatic cholestasis type 1; FIC1-A, no PPTM; FIC1-B, 1 PPTM; FIC1-C, 2 PPTMs; PPTM, predicted protein truncating mutation; VOUS, variant of unknown significance.

**Supporting TABLE S2. Follow-Up Characteristics of All Included FIC1 Deficiency Patients**

| <b>Parameter</b>                  | <b>Outcome</b> |
|-----------------------------------|----------------|
| <b>SBD</b>                        | <b>n = 62</b>  |
| PEBD, n (%)                       | 49 (79)        |
| GCD, n (%)                        | 6 (10)         |
| IE, n (%)                         | 4 (5)          |
| TBD, n (%)                        | 1 (2)          |
| Cholecystojejunostomy, n (%)      | 1 (2)          |
| Unknown, n (%)                    | 1 (2)          |
| <b>Indication for SBD</b>         |                |
| Pruritus, n (%)                   | 21 (32)        |
| Cholestasis, n (%)                | 1 (2)          |
| Unknown, n (%)                    | 41 (65)        |
| <b>LT</b>                         | <b>n = 38</b>  |
| <b>Indication for LT</b>          |                |
| Pruritus, n (%)                   | 19 (50)        |
| ESLD, n (%)                       | 9 (23)         |
| Unknown, n (%)                    | 10 (28)        |
| <b>Mortality (pre-LT)</b>         | 8 (6)          |
| <b>Causes of death</b>            |                |
| Related to liver disease, n (%)   | 6 (75)         |
| Unrelated to liver disease, n (%) | 2 (25)         |
| <b>HCC, n (%)</b>                 | 0 (0)          |

Abbreviations: ESLD, end-stage liver disease; GCD, gallbladder-colic diversion; HCC, hepatocellular carcinoma; IE, ileal exclusion; LT, liver transplantation; PEBD, partial external biliary diversion; SBD, surgical biliary diversion; TBD, total biliary diversion.

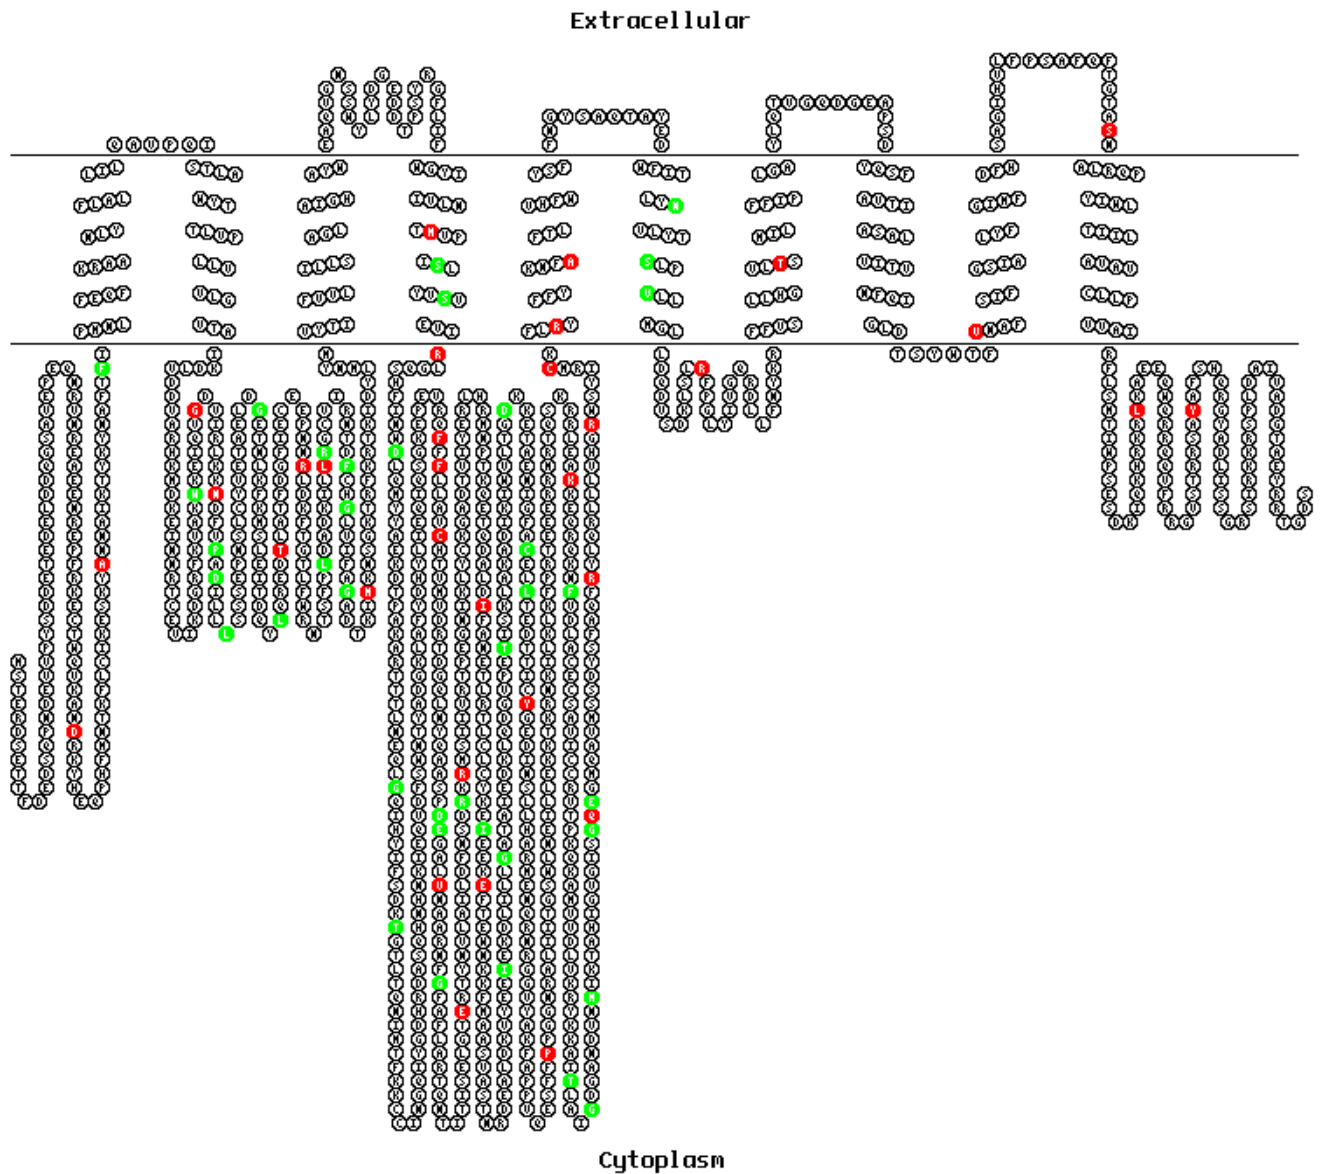

**Supporting FIG. S1.** Locations of observed mutations in *ATP8B1*. TOPO2 software model of FIC1 protein based on sequence and transmembrane regions by UniProt. Red: PPTM. Green: non-PPTM. The first affected position is marked for frameshift variants. Abbreviations: ATP8B1, adenosine triphosphate (ATP)ase phospholipid transporting 8B1; FIC1, familial intrahepatic cholestasis type 1; PPTM, predicted protein truncating mutation.

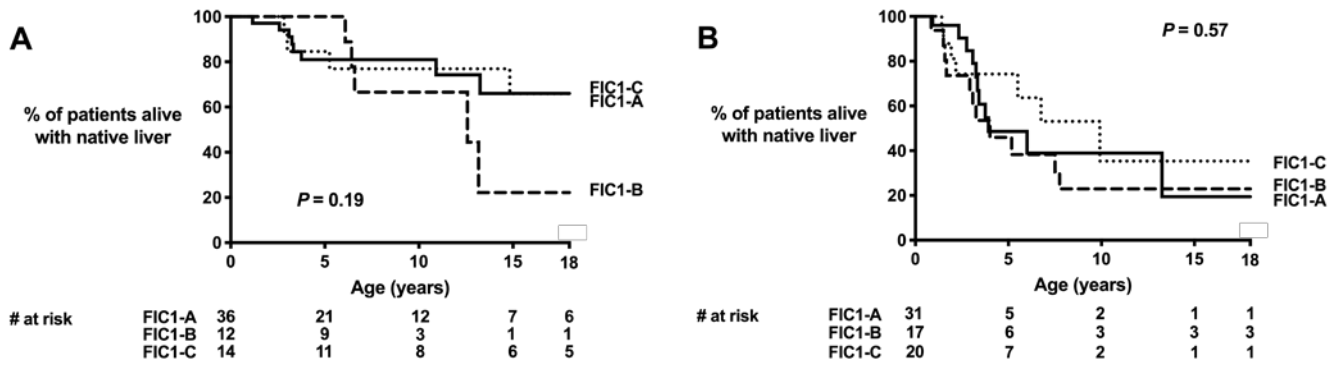

**Supporting FIG. S2.** NLS in (A) patients who had undergone SBD during follow-up and (B) patients who had not undergone SBD during follow-up. Abbreviations: FIC1-A, no PPTM; FIC1-B, 1 PPTM; FIC1-C, 2 PPTMs; NLS, native liver survival; SBD, surgical biliary diversion.



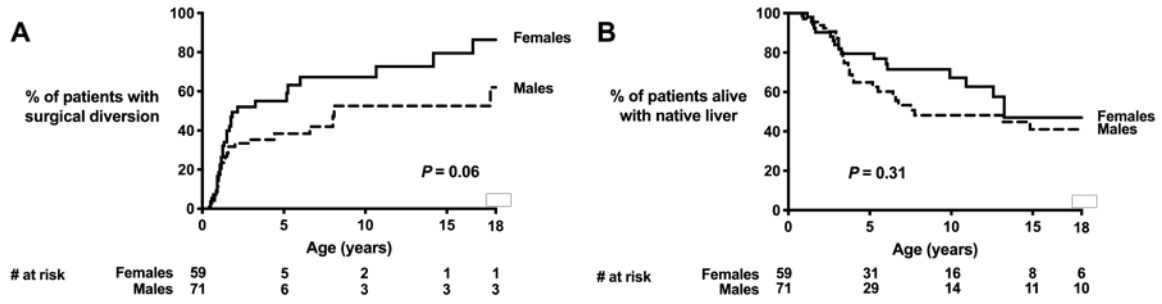

**Supporting FIG. S3.** (A) Proportion of patients with an SBD over time in male and female patients. (B) Proportion of patients alive with native liver over time in male and female patients.

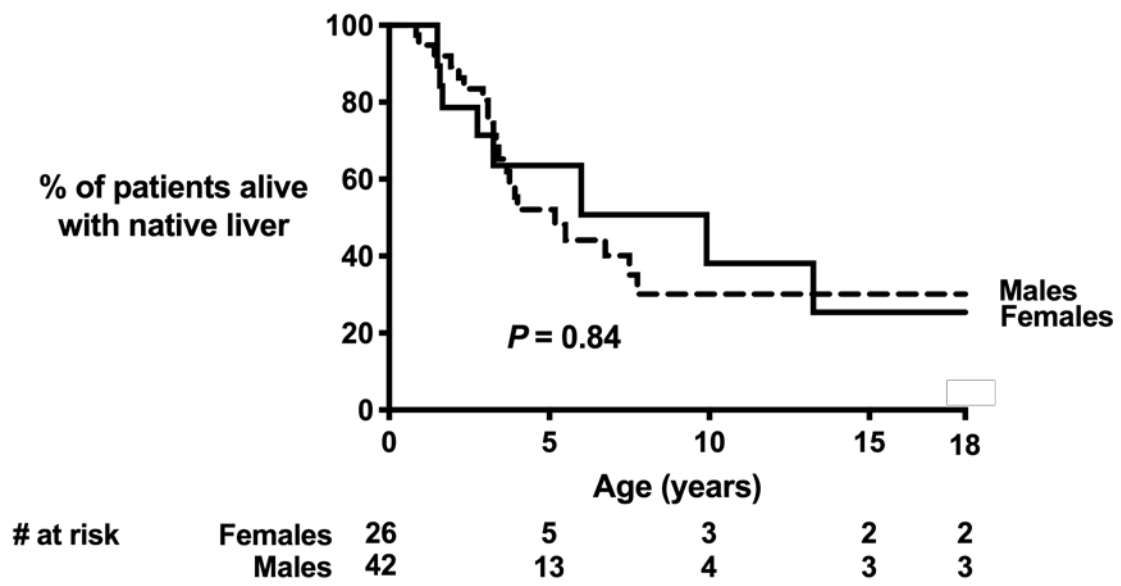

**Supporting FIG. S4.** Proportion of patients alive with native liver over time in male and female patients who had not undergone surgical diversion during follow-up.

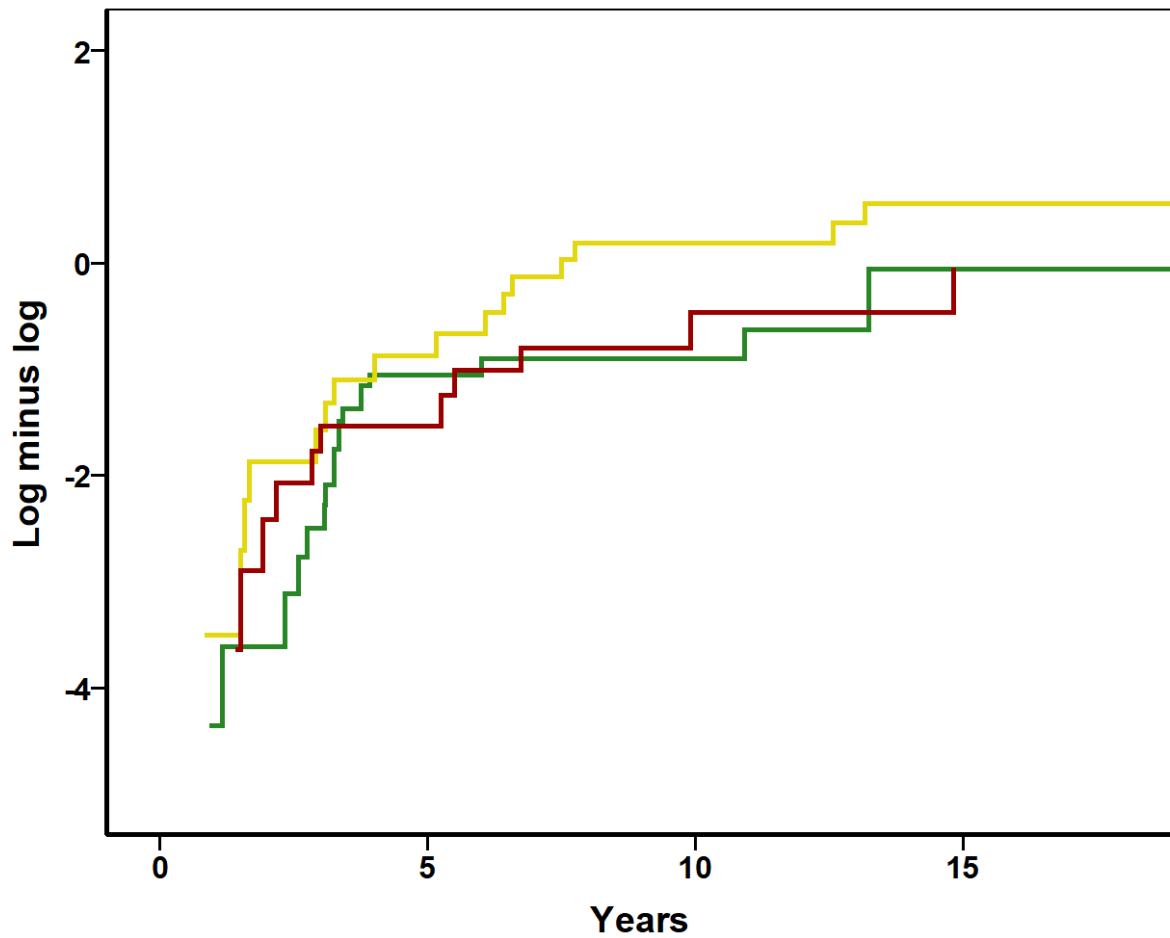

**Supporting FIG. S5.** Log minus log plot to assess the assumption of proportional hazard for time-dependent Cox regression (Fig. 5) in patients with an FIC1-A (green line), FIC1-B (orange line), and FIC1-C (red line) genotype. This graph shows that in FIC1-B patients, the risk for an event (i.e., LT or death) increases to a greater extent than in FIC1-A or FIC1-C patients. Abbreviation: LT, liver transplantation.
